# Supplementary material
Source: PubMed Central journal article supplement (PMC1569652)

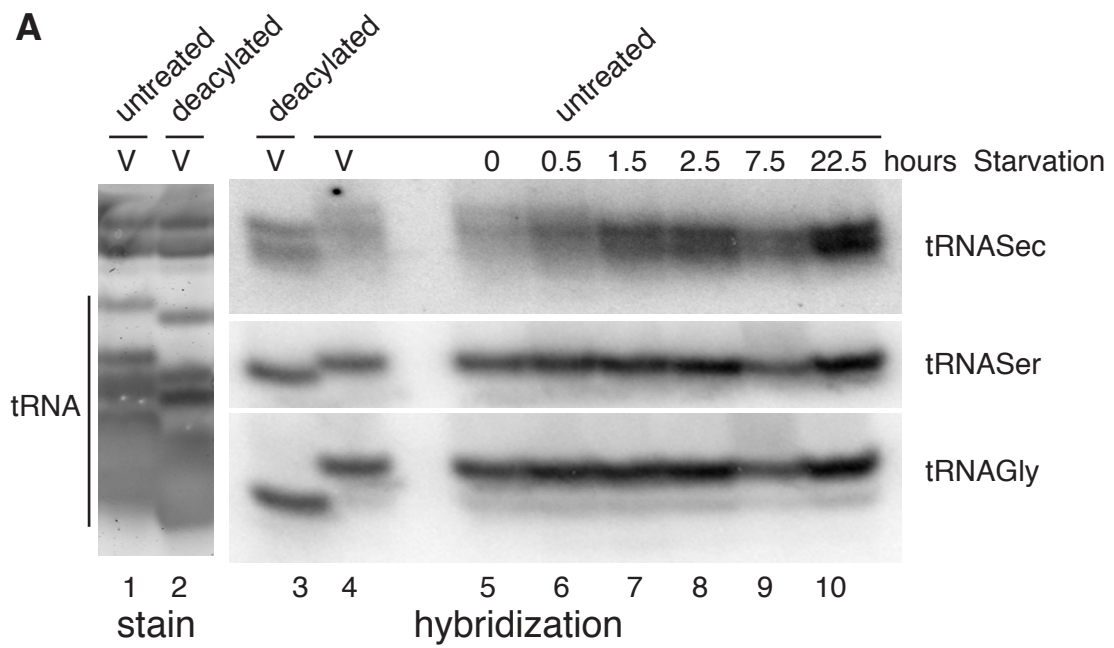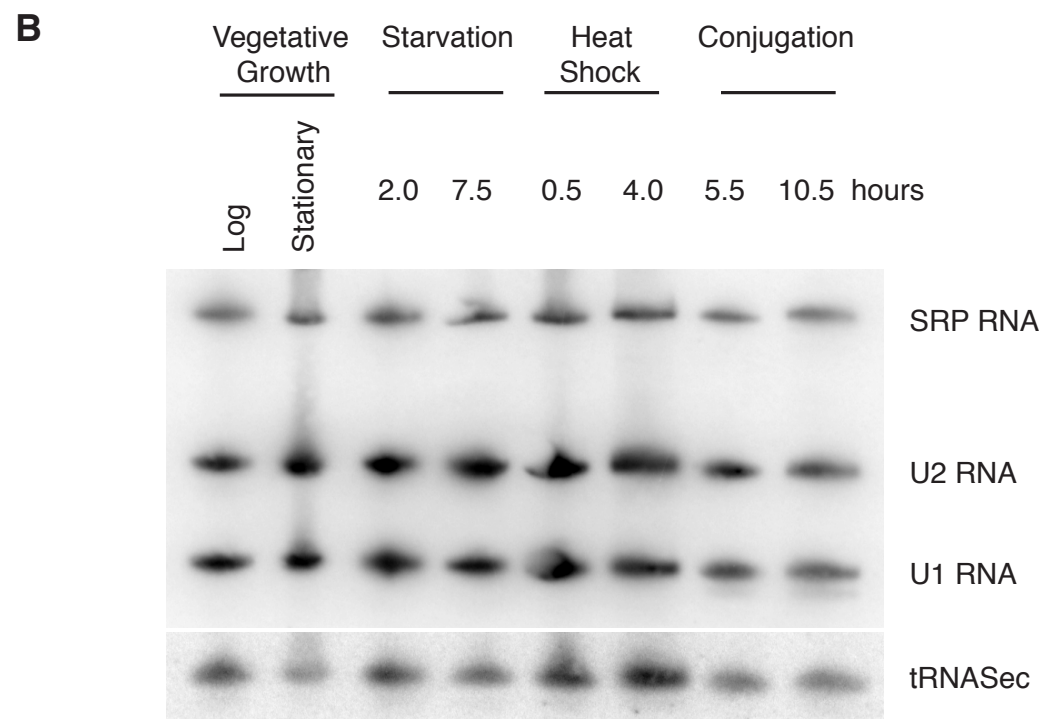

Supplement: pbio.0040286.sg004.pdf [file pbio.0040286.sg004.pdf]
